# Supplementary material for: Evolutionary analysis of the SUB1 locus across the Oryza genomes
Source: PubMed Central journal article supplement (PMC5296262; doi:10.1186/s12284-016-0140-3), 2017-02-07
Supplement: 12284_2016_140_MOESM4_ESM.pdf [file 12284_2016_140_MOESM4_ESM.pdf]

# Chr 1

*O. barthii*

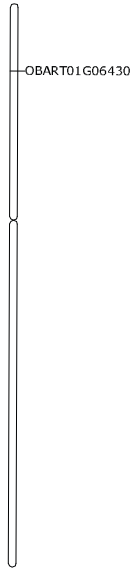

*O. nivara*

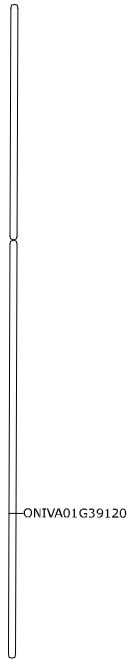

# Chr 9

*L. perrieri*

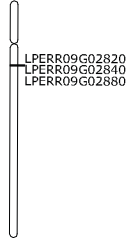

*O. brachyantha*

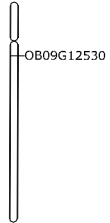

*O. glaberrima*

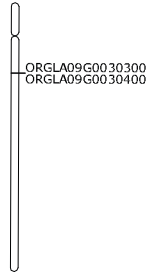

*O. glumaepatula*

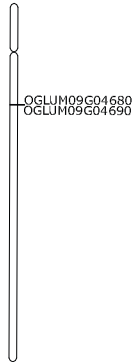

*O. meridionalis*

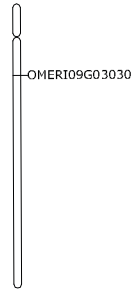

*O. nivara*

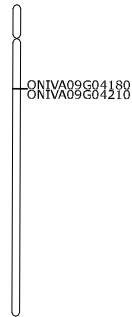

*O. punctata*

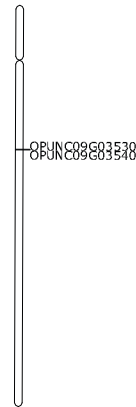

*O. rufipogon*

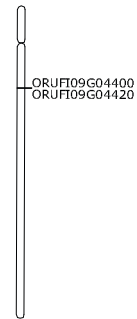

*O. sativa* subsp. *indica*

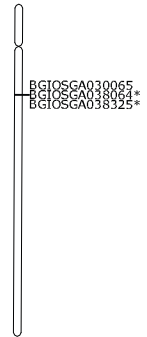

*O. sativa* subsp. *japonica*

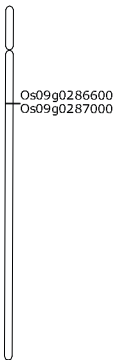

\* Scaffold not anchored to Chr 9
