# Supplementary material for: Evolutionary analysis of the SUB1 locus across the Oryza genomes
Source: PubMed Central journal article supplement (PMC5296262; doi:10.1186/s12284-016-0140-3), 2017-02-07

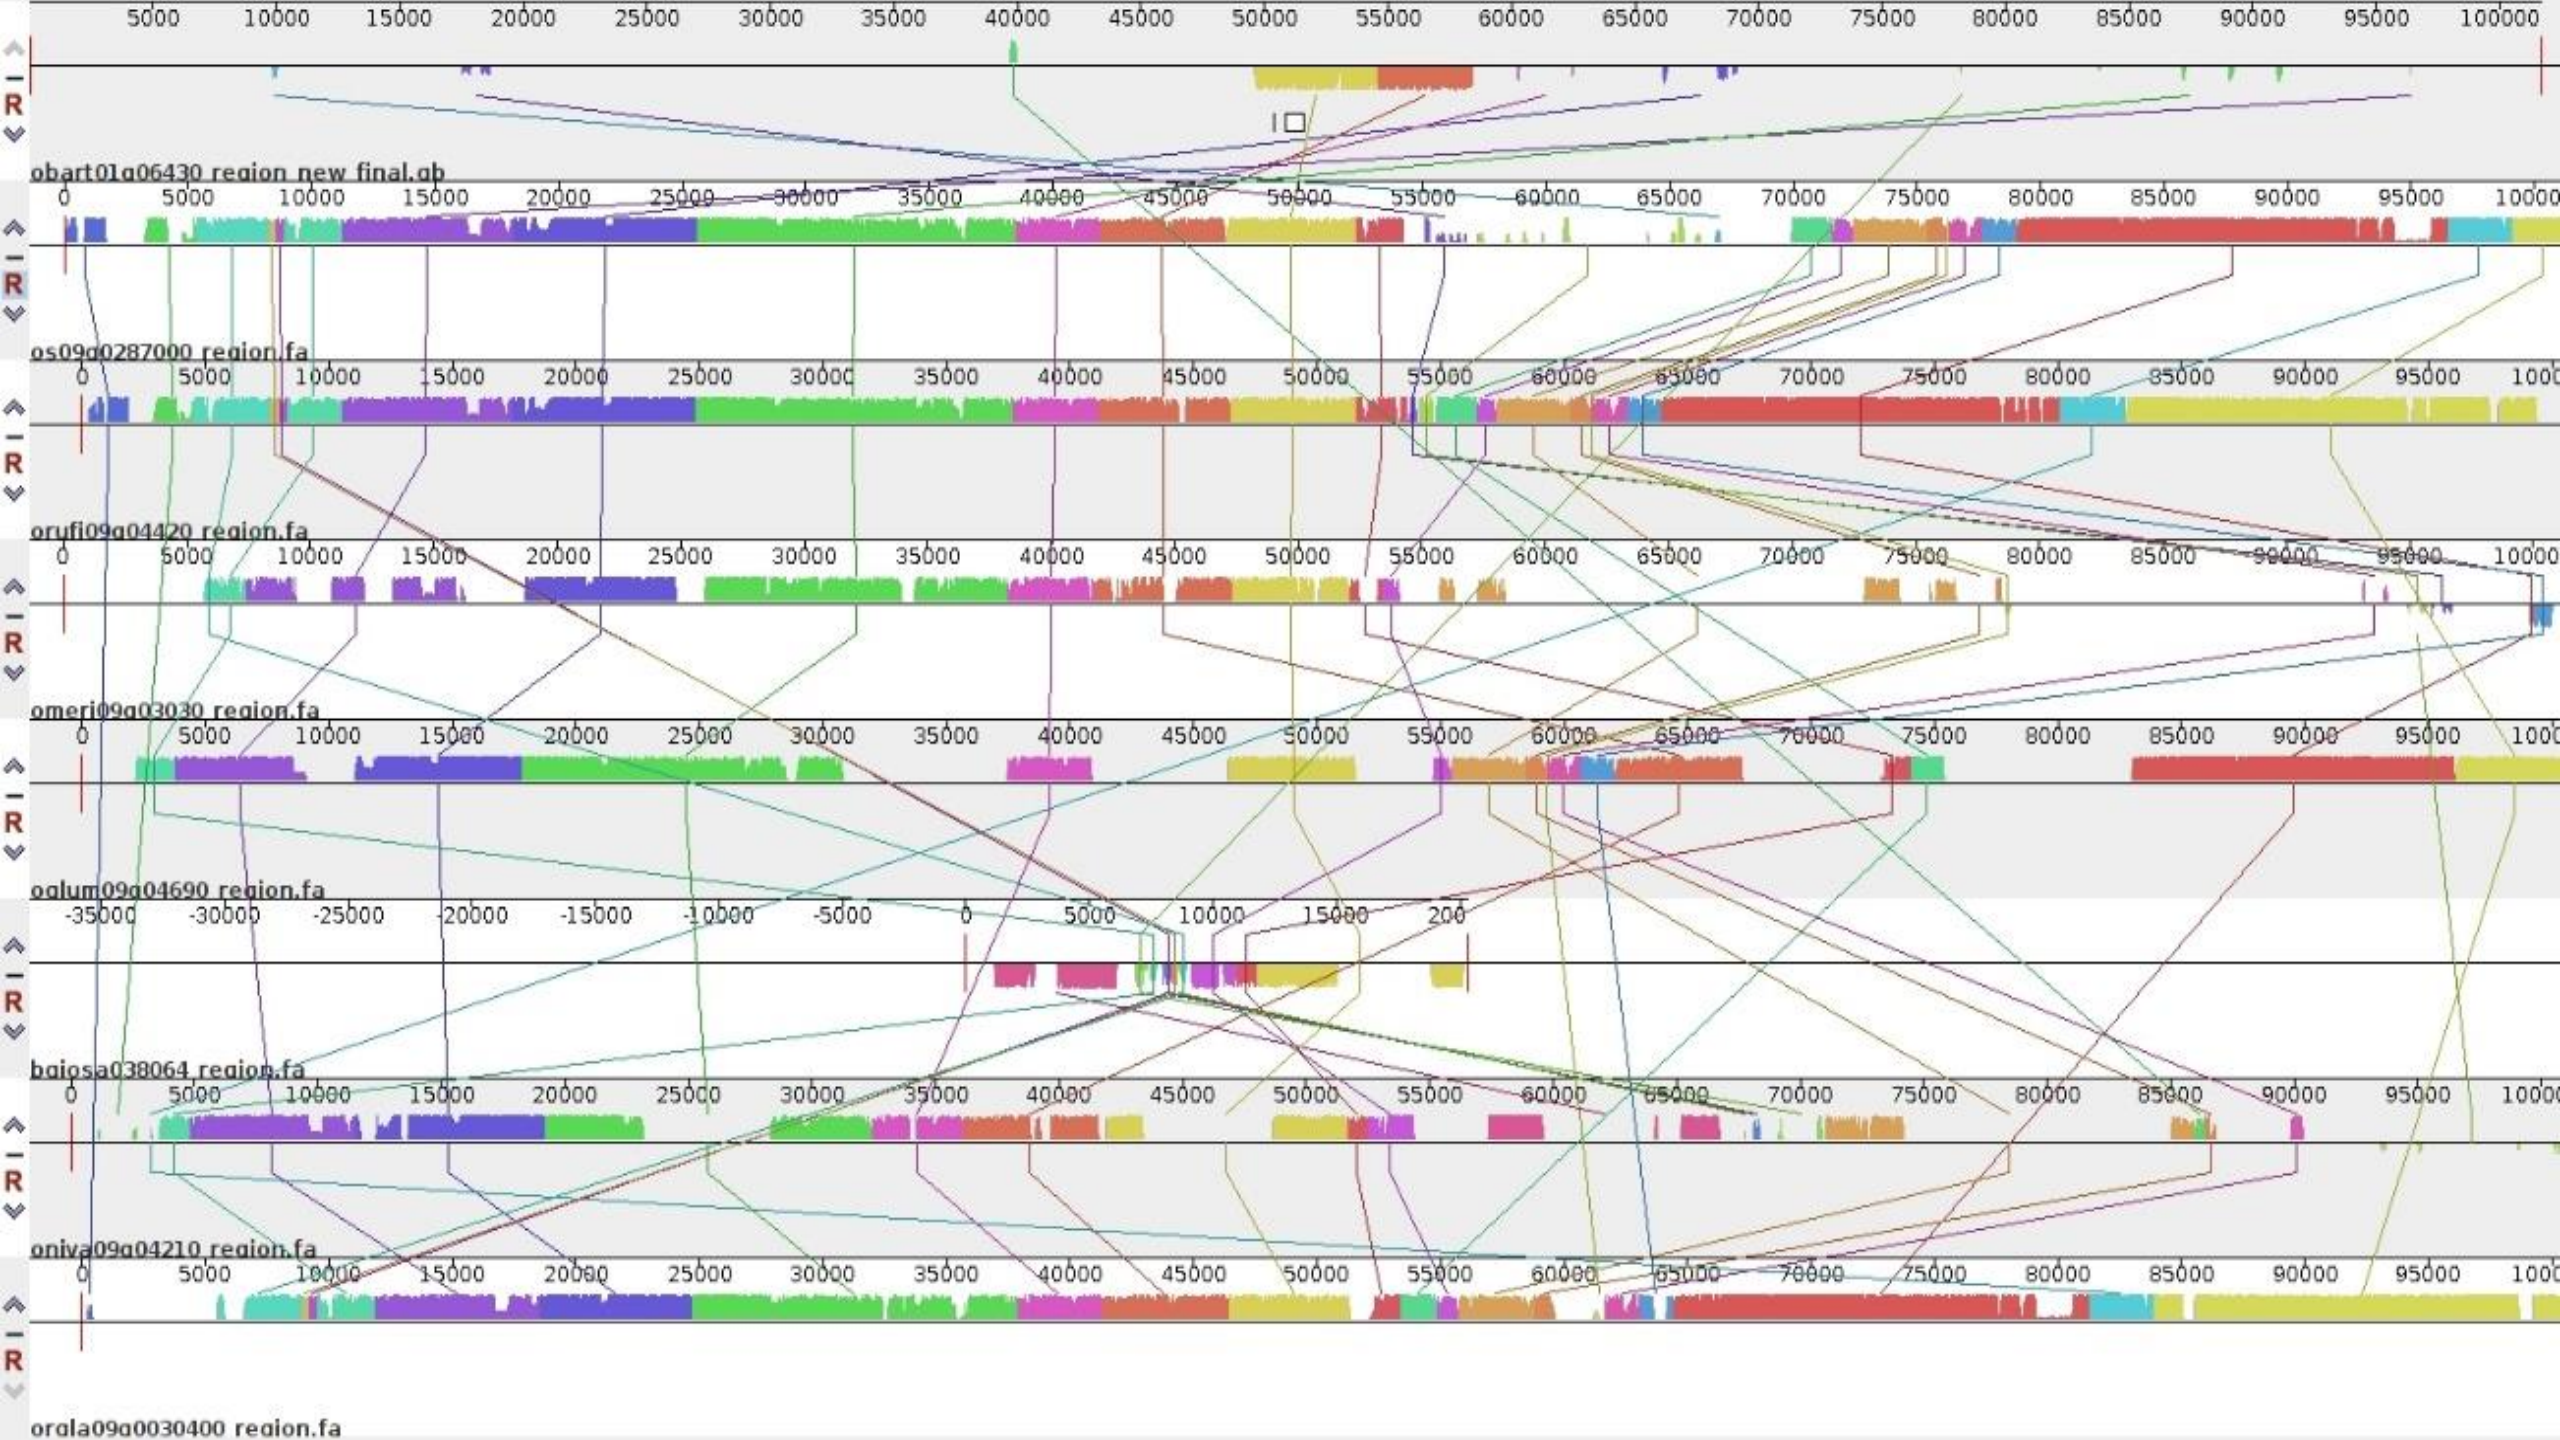

Supplement: 12284_2016_140_MOESM5_ESM.pdf [file 12284_2016_140_MOESM5_ESM.pdf]
