# Supplementary material for: Evolutionary analysis of the SUB1 locus across the Oryza genomes
Source: Rice (N Y). 2017 Feb 7;10:4. doi: 10.1186/s12284-016-0140-3 (PMC5296262; doi:10.1186/s12284-016-0140-3)
Supplement: Additional file 7: Figure S6. — Alignment of the promoter region (1,500 bps upstream) of SUB1A-like genes, showing polymorphisms found when comparing SUB1A-1 and SUB1A-2 alleles. (PDF 2215 kb) [file 12284_2016_140_MOESM7_ESM.pdf]

|                             |                                                               |
|-----------------------------|---------------------------------------------------------------|
| SUB1A-1_IR40931-26_Upstream | AGCTTATGGAGTCTACTTTTCAGATGGTTTTTGGTCCCCAGTCAAAATTCTTACCAAAC   |
| UPSTREAM_ONIVA01G39120      | AGCTTATGGAGTCTACTTTTCAGATGGTTTTTGGTCCCCAGTCAAAATTCTTACCAAAC   |
| SUB1A-2_93-11_Upstream      | AGCTTATGGAGTCTACTTTTCAGATGGTTTTTGGTCCCTAGTCAAAATTCTTACCAAAC   |
| SUB1A-2_Teqing_Upstream     | AGCTTATGGAGTCTACTTTTCAGATGGTTTTTGGTCCCTAGTCAAAATTCTTACCAAAC   |
|                             | *****                                                         |
| SUB1A-1_IR40931-26_Upstream | TGGGAATCTGCAAAACAAGCCATGTATCTTATCCAGTCCGAATCTGATTTGGGTTTTGGG  |
| UPSTREAM_ONIVA01G39120      | TGGGAATCTGCAAAACAAGCCATGTATCTTATCCAGTCCGAATCTGATTTGGGTTTTGGG  |
| SUB1A-2_93-11_Upstream      | TGGGAATCTGCAAAACAAGCCACGTATCTTATCCAGTCCGAATCTGATTTGGGTTTTGGG  |
| SUB1A-2_Teqing_Upstream     | TGGGAATCTGCAAAACAAGCCACGTATCTTATCCAGTCCGAATCTGATTTGGGTTTTGGG  |
|                             | *****                                                         |
| SUB1A-1_IR40931-26_Upstream | CTTTGTAATTGTGTTGTGGGCTTAGCCCAAGTGGTTGTGCGCACTAGGGCAACCTAGGA   |
| UPSTREAM_ONIVA01G39120      | CTTTGTAATTGTGTTGTGGGCTTAGCCCAAGTGGTTGTGCGCACTAGGGCAACCTAGGA   |
| SUB1A-2_93-11_Upstream      | CTTTGTAATTGTGTTGTGGGCTTAGCCCAAGGGTTGTGCGCACTAGGGCAACCTAGGA    |
| SUB1A-2_Teqing_Upstream     | CTTTGTAATTGTGTTGTGGGCTTAGCCCAAGGGTTGTGCGCACTAGGGCAACCTAGGA    |
|                             | *****                                                         |
| SUB1A-1_IR40931-26_Upstream | CGTCCTTAATCATATTTATTTCAGTAGCCGTCATCGTTTAGAGTTGGGTTTTGCTTAGAAT |
| UPSTREAM_ONIVA01G39120      | CGTCCTTAATCATATTTATTTCAGTAGCCGTCATCGTTTAGAGTTGGGTTTTGCTTAGAAT |
| SUB1A-2_93-11_Upstream      | CGTCCTTAATCATATTTATTTCAGTAGCCGTCATCGTTTAGAGTGGGTTTTGCTTAGAAT  |
| SUB1A-2_Teqing_Upstream     | CGTCCTTAATCATATTTATTTCAGTAGCCGTCATCGTTTAGAGTGGGTTTTGCTTAGAAT  |
|                             | *****                                                         |
| SUB1A-1_IR40931-26_Upstream | ATTCTGTCAAGAACAGTTTTTGCCGCTAGATCGGTTTGTGGAACCCAAAATTAGAGTGCTT |
| UPSTREAM_ONIVA01G39120      | ATTCTGTCAAGAACAGTTTTTGCCGCTAGATCGGTTTGTGGAACCCAAAATTAGAGTGCTT |
| SUB1A-2_93-11_Upstream      | ATTCTGTCAAGAACAGTTTTTGCCGCTAGATCGGTTTGTGGAACCCAAAATTAGAGTGCTT |
| SUB1A-2_Teqing_Upstream     | ATTCTGTCAAGAACAGTTTTTGCCGCTAGATCGGTTTGTGGAACCCAAAATTAGAGTGCTT |
|                             | *****                                                         |
| SUB1A-1_IR40931-26_Upstream | AATCATTCATATGCAATTGTGTTGCAATCTATCTTGTGTGCTTGTGTTCTTCGATTCA    |
| UPSTREAM_ONIVA01G39120      | AATCATTCATATGCAATTGTGTTGCAATCTATCTTGTGTGCTTGTGTTCTTCGATTCA    |
| SUB1A-2_93-11_Upstream      | AATCATTCATATGCAATTGTGTTGCAATCTATCTTGTGTGCTTGTGTTCTTCGATTCA    |
| SUB1A-2_Teqing_Upstream     | AATCATTCATATGCAATTGTGTTGCAATCTATCTTGTGTGCTTGTGTTCTTCGATTCA    |
|                             | *****                                                         |
| SUB1A-1_IR40931-26_Upstream | CATGCAGGGATTAGCCTTCTCGGCGAGGTCAACCGGGTTTCAGCACGGTTGATAACCGGA  |
| UPSTREAM_ONIVA01G39120      | CATGCAGGGATTAGCCTTCTCGGCGAGGTCAACCGGGTTTCAGCACGGTTGATAACCGGA  |
| SUB1A-2_93-11_Upstream      | CATGCAGGGATTAGCCTTCTCGGCAAGGTCAACCGGGTTTCGGCACGGTTGATAACCGGA  |
| SUB1A-2_Teqing_Upstream     | CATGCAGGGATTAGCCTTCTCGGCAAGGTCAACCGGGTTTCGGCACGGTTGATAACCGGA  |
|                             | *****                                                         |
| SUB1A-1_IR40931-26_Upstream | GGAGACGTGGTGCTACGATTGCGGGGCTCAGTTGCGTGTTTCGTTCAGAAGCCGGATCGAG |
| UPSTREAM_ONIVA01G39120      | GGAGACGTGGTGCTACGATTGCGGGGCTCAGTTGCGTGTTTCGTTCAGAAGCCGGATCGAG |
| SUB1A-2_93-11_Upstream      | GGAGACGTGGTGCTACGATTGCGGGGCTCAGTTGCGTGTTTCGTTCAGAAGCCGGATCGAG |
| SUB1A-2_Teqing_Upstream     | GGAGACGTGGTGCTACGATTGCGGGGCTCAGTTGCGTGTTTCGTTCAGAAGCCGGATCGAG |
|                             | *****                                                         |
| SUB1A-1_IR40931-26_Upstream | TTGTGTGCGGACTCCGCCAAATCGACTATTTATCAATACCTATCGGAAGATCGGGACCT   |
| UPSTREAM_ONIVA01G39120      | TTGTGTGCGGACTCCGCCAAATCGACTATTTATCAATACCTATCGGAAGATCGGGACCT   |
| SUB1A-2_93-11_Upstream      | TTGTGTGCGGACTCCGCCAAATCGACTATTTATCAATACCTATCGGAAGATCGGGACCT   |
| SUB1A-2_Teqing_Upstream     | TTGTGTGCGGACTCCGCCAAATCGACTATTTATCAATACCTATCGGAAGATCGGGACCT   |
|                             | *****                                                         |
| SUB1A-1_IR40931-26_Upstream | AACATCCCCCATCAAATAGCTATATCATTCTCAAACATTTATAGATGGATATTTAAACC   |
| UPSTREAM_ONIVA01G39120      | AACATCCCCCATCAAATAGCTATATCATTCTCAAACATTTATAGATGGATATTTAAACC   |
| SUB1A-2_93-11_Upstream      | AACATCCCCCATCAAATAGCTATATCATTCTCAAACATTTATAGATGGATATTTAAACC   |
| SUB1A-2_Teqing_Upstream     | AACATCCCCCATCAAATAGCTATATCATTCTCAAACATTTATAGATGGATATTTAAACC   |
|                             | *****                                                         |
| SUB1A-1_IR40931-26_Upstream | CTGCTATTTCTGCAACCGTTGCGAGCTAGCTGTCTGAACCTAAAGGCTTACGAAATGTAT  |
| UPSTREAM_ONIVA01G39120      | CTGCTATTTCTGCAACCGTTGCGAGCTAGCTGTCTGAACCTAAAGGCTTACGAAATGTAT  |
| SUB1A-2_93-11_Upstream      | CTGCTATTTCTGCAACCGTTGCGAGCTAGCTGTCTGAACCTAAAGGCTTACGAAATGTAT  |
| SUB1A-2_Teqing_Upstream     | CTGCTATTTCTGCAACCGTTGCGAGCTAGCTGTCTGAACCTAAAGGCTTACGAAATGTAT  |
|                             | ** *****                                                      |
| SUB1A-1_IR40931-26_Upstream | CATTTCCACGCTGGGTTATGTCAGCCCTATGTGAACTAGGGAATACACCCATGTGAGAAC  |
| UPSTREAM_ONIVA01G39120      | CATTTCCACGCTGGGTTATGTCAGCCCTATGTGAACTAGGGAATACACCCATGTGAGAAC  |
| SUB1A-2_93-11_Upstream      | CATTTCCACGCTGGGTATGTCAGCCCTATGTGAACTAGGGAATACACCCATGTGAGAAC   |
| SUB1A-2_Teqing_Upstream     | CATTTCCACGCTGGGTATGTCAGCCCTATGTGAACTAGGGAATACACCCATGTGAGAAC   |
|                             | *****                                                         |
| SUB1A-1_IR40931-26_Upstream | AAGCATACCACTAAGGCCATAGGTATAGATGGCCGAATCGGCTGCAAGGCCGACCTATC   |
| UPSTREAM_ONIVA01G39120      | AAGCATACCACTAAGGCCATAGGTATAGATGGCCGAATCGGCTGCAAGGCCGACCTATC   |
| SUB1A-2_93-11_Upstream      | AAGCATACCACTAAGGCCATAGGTATAGATGGCCGAATCGGCTGCAAGGCCGACCTATC   |
| SUB1A-2_Teqing_Upstream     | AAGCATACCACTAAGGCCATAGGTATAGATGGCCGAATCGGCTGCAAGGCCGACCTATC   |
|                             | *****                                                         |
| SUB1A-1_IR40931-26_Upstream | GGGCACGACCAAGCCCGACCTGAGACCAGTCGGGTTACACGACCCAACGTACACGTTGG   |
| UPSTREAM_ONIVA01G39120      | GGGCACGACCAAGCCCGACCTGAGACCAGTCGGGTTACACGACCCAACGTACACGTTGG   |
| SUB1A-2_93-11_Upstream      | GGGCACGACCAAGCCCGACCTGAGACCAGTCGGGTTACACGACCCAACGTACACGTTGG   |
| SUB1A-2_Teqing_Upstream     | GGGCACGACCAAGCCCGACCTGAGACCAGTCGGGTTACACGACCCAACGTACACGTTGG   |
|                             | *****                                                         |
| SUB1A-1_IR40931-26_Upstream | GCCGGGCTGTGCCCGCCACATGTTGCACCAACGGCCGAAGCACAATTCAATAAGACTCG   |
| UPSTREAM_ONIVA01G39120      | GCCGGGCTGTGCCCGCCACATGTTGCACCAACGGCCGAAGCACAATTCAATAAGACTCG   |
| SUB1A-2_93-11_Upstream      | GCCGGGCTGTGCCCGCCACATGTTGCACCAACGGCCGAAGCACAATTCAATAAGACTCG   |
| SUB1A-2_Teqing_Upstream     | GCCGGGCTGTGCCCGCCACATGTTGCACCAACGGCCGAAGCACAATTCAATAAGACTCG   |
|                             | *****                                                         |
| SUB1A-1_IR40931-26_Upstream | GGCTGTGCCTGGCTGGCCCAAAGGCACGAAAGCCACCGTGCTCCTCCATGGAAAAAAGT   |
| UPSTREAM_ONIVA01G39120      | GGCTGTGCCTGGCTGGCCCAAAGGCACGAAAGCCACCGTGCTCCTCCATGGAAAAAAGT   |
| SUB1A-2_93-11_Upstream      | GGCTGTGCCTGGCTGGCCCAAAGGCACGAAAGCCACCGTGCTCCTCCATGGAAAAAAGT   |
| SUB1A-2_Teqing_Upstream     | GGCTGTGCCTGGCTGGCCCAAAGGCACGAAAGCCACCGTGCTCCTCCATGGAAAAAAGT   |
|                             | *****                                                         |
| SUB1A-1_IR40931-26_Upstream | CTATTTGCCTCTCGTATCCGGGCCATCTCTTATATGACTGAAATAAGTCTACTTTGCATT  |
| UPSTREAM_ONIVA01G39120      | CTATTTGCCTCTCGTATCCGGGCCATCTCTTATATGACTGAAATAAGTCTACTTTGCATT  |
| SUB1A-2_93-11_Upstream      | CTATTTGCCTCTCGTATCCGGGCCATCTCTTATATGACTGAAATAAGTCTACTTTGCATT  |
| SUB1A-2_Teqing_Upstream     | CTATTTGCCTCTCGTATCCGGGCCATCTCTTATATGACTGAAATAAGTCTACTTTGCATT  |
|                             | *****                                                         |
| SUB1A-1_IR40931-26_Upstream | CCTCATCTCTTTTGGTCGTGTCTTATACGGCTGTAATAAGTCTATTTTGGCTCCACATC   |
| UPSTREAM_ONIVA01G39120      | CCTCATCTCTTTTGGTCGTGTCTTATACGGCTGTAATAAGTCTATTTTGGCTCCACATC   |
| SUB1A-2_93-11_Upstream      | CCTCATCTCTTTTGGTCGTGTCTTATACGGCTGTAATAAGTCTATTTTGGCTCCACATC   |
| SUB1A-2_Teqing_Upstream     | CCTCATCTCTTTTGGTCGTGTCTTATACGGCTGTAATAAGTCTATTTTGGCTCCACATC   |
|                             | *****                                                         |
| SUB1A-1_IR40931-26_Upstream | TATTTTGCCTCCATTATTGTTGGAGAGGGCCGCCCCATCGTGCTAAGGCGGATGCCCAGG  |
| UPSTREAM_ONIVA01G39120      | TATTTTGCCTCCATTATTGTTGGAGAGGGCCGCCCCATCGTGCTAAGGCGGATGCCCAGG  |
| SUB1A-2_93-11_Upstream      | TATTTTGCCTCCATTATTGTTGGAGAGGGCCGCCCCATCGTGCTAAGGCGGATGCCCAGG  |
| SUB1A-2_Teqing_Upstream     | TATTTTGCCTCCATTATTGTTGGAGAGGGCCGCCCCATCGTGCTAAGGCGGATGCCCAGG  |
|                             | *****                                                         |
| SUB1A-1_IR40931-26_Upstream | CATGGCCCAAAATTCGACCGAGGCGAGCATGAGCCGATACCAGATAGACCGAGCCATGT   |
| UPSTREAM_ONIVA01G39120      | CATGGCCCAAAATTCGACCGAGGCGAGCATGAGCCGATACCAGATAGACCGAGCCATGT   |
| SUB1A-2_93-11_Upstream      | CATGGCCCAAAATTCGACCGAGGCGAGCATGAGCCGATACCAGATAGACCGAGCCATGT   |
| SUB1A-2_Teqing_Upstream     | CATGGCCCAAAATTCGACCGAGGCGAGCATGAGCCGATACCAGATAGACCGAGCCATGT   |
|                             | *****                                                         |
| SUB1A-1_IR40931-26_Upstream | TTGGGTTAGACCAAAACCCCGTGCCATGGGTTGGACCGTCGGGCCCGGGCCTCTCGGCC   |
| UPSTREAM_ONIVA01G39120      | TTGGGTTAGACCAAAACCCCGTGCCATGGGTTGGACCGTCGGGCCCGGGCCTCTCGGCC   |
| SUB1A-2_93-11_Upstream      | TTGGGTTAGACCAAAACCCCGTGCCATGGGTTGGACCGTCGGGCCCGGGCCTCTCGGCC   |
| SUB1A-2_Teqing_Upstream     | TTGGGTTAGACCAAAACCCCGTGCCATGGGTTGGACCGTCGGGCCCGGGCCTCTCGGCC   |
|                             | *****                                                         |
| SUB1A-1_IR40931-26_Upstream | AACTATAGACATAGGCACTGCAATGTTGCTTGAGAAAAAAAATTATAGTCACACTAGA    |
| UPSTREAM_ONIVA01G39120      | AACTATAGACATAGGCACTGCAATGTTGCTTGAGAAAAAAAATTATAGTCACACTAGA    |
| SUB1A-2_93-11_Upstream      | AACTATAGACATAGGCACTGCAATGTTGCTTGAGAAAAAAAATTATAGTCACACTAGA    |
| SUB1A-2_Teqing_Upstream     | AACTATAGACATAGGCACTGCAATGTTGCTTGAGAAAAAAAATTATAGTCACACTAGA    |
|                             | *****                                                         |
| SUB1A-1_IR40931-26_Upstream | TTGGATGTCTATTTGTTAATACTGTTAGGACAAGCACGACTTGTTCCCGCTACATCCCAC  |
| UPSTREAM_ONIVA01G39120      | TTGGATGTCTATTTGTTAATACTGTTAGGACAAGCACGACTTGTTCCCGCTACATCCCAC  |
| SUB1A-2_93-11_Upstream      | TTGGATGTCTATTTGTTAATACTGTTAGGACAAGCACGACTTGTTCCCGCTACATCCCAC  |
| SUB1A-2_Teqing_Upstream     | TTGGATGTCTATTTGTTAATACTGTTAGGACAAGCACGACTTGTTCCCGCTACATCCCAC  |
|                             | *****                                                         |
| SUB1A-1_IR40931-26_Upstream | TCCGATATACAAAGTGATTTTCGACCGCCCCCTTGGCCTTCCAGCCTATATATATCAACAA |
| UPSTREAM_ONIVA01G39120      | TCCGATATACAAAGTGATTTTCGACCGCCCCCTTGGCCTTCCAGCCTATATATATCAACAA |
| SUB1A-2_93-11_Upstream      | TCCGATATACAAAGTGATTTTCGACCGCCCCCTTGGCCTTCCAGCCTATATATATCAACAA |
| SUB1A-2_Teqing_Upstream     | TCCGATATACAAAGTGATTTTCGACCGCCCCCTTGGCCTTCCAGCCTATATATATCAACAA |
|                             | *****                                                         |
| SUB1A-1_IR40931-26_Upstream | CTTCTACCC                                                     |
| UPSTREAM_ONIVA01G39120      | CTTCTACCC                                                     |
| SUB1A-2_93-11_Upstream      | CTTCTACCC                                                     |
| SUB1A-2_Teqing_Upstream     | CTTCTACCC                                                     |
|                             | *****                                                         |
